# Supplementary material for: Design and attitude control of a novel robotic jellyfish capable of 3D motion
Source: Springer Nature journal article supplement (doi:10.1007/s11432-018-9649-8), 2019-07-25
Supplement: 11432_2018_9649_MOESM2_ESM.pdf [file 11432_2018_9649_MOESM2_ESM.pdf]

# **Design and Attitude Control of a Novel Robotic Jellyfish Capable of 3D Motion**

**Junzhi YU, Xiangbin LI, Lei PANG, and Zhengxing WU**

***State Key Lab. of Management and Control for Complex Systems  
Institute of Automation, Chinese Academy of Sciences***

**October 10, 2018**

# Outline

**01** Introduction

**02** Development of the Robotic Prototype

**03** Reinforcement Learning Based  
Attitude Control

**04** Experiments and Results

**05** Conclusion and Future Work

# 1. Introduction

## A. Jet propulsion

- ❑ Jellyfishes propel themselves through their surroundings by radially expanding and contracting their bell-shaped bodies to push water behind them, **which have been proven to be one of the most energetically efficient swimmers** on the planet.
- ❑ Jellyfish-like swimming will have a remarkable propulsive advantage **if low-energy propulsion is demanded.**

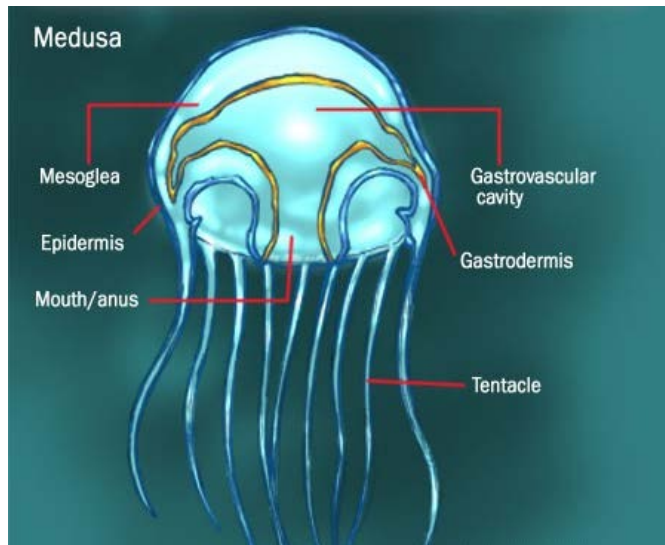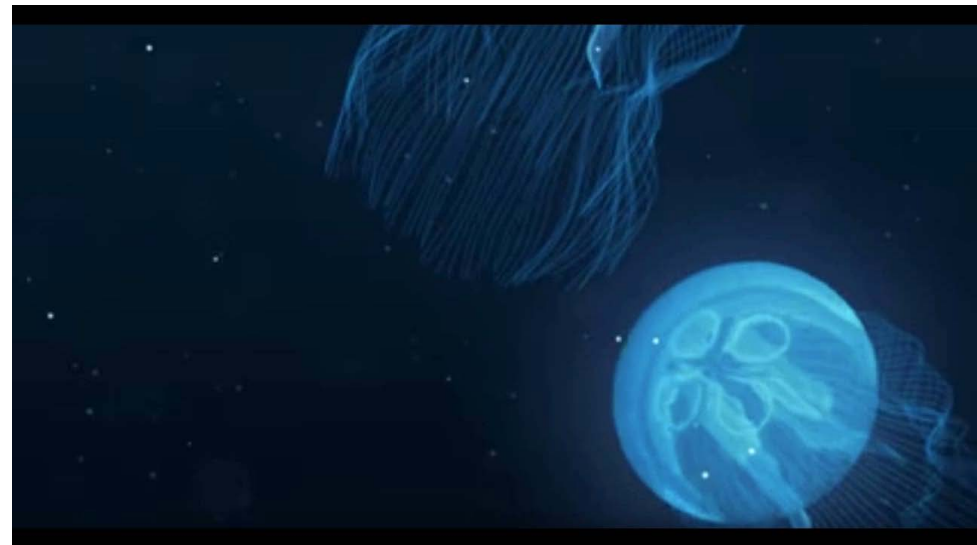

# 1. Introduction

## B. Robotic jellyfish

- ▣ Various robotic jellyfishes have been developed benefiting from the latest advancements in mechatronic design, materials, electronics, etc.

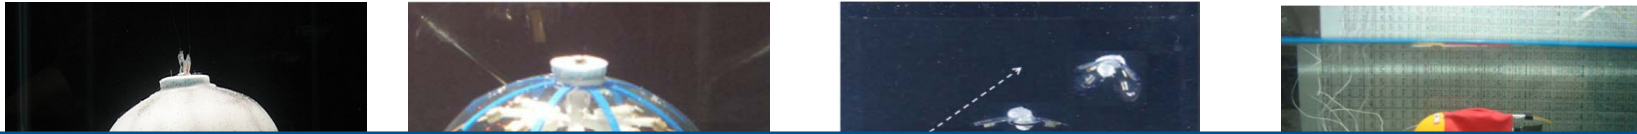

Most of existing robotic jellyfishes cannot freely adjust their three-axis attitude, which has an adverse effect on free-swimming propulsion and plausible applications.

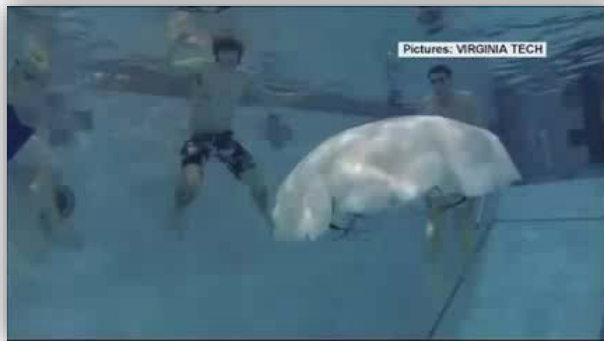

Virginia Tech

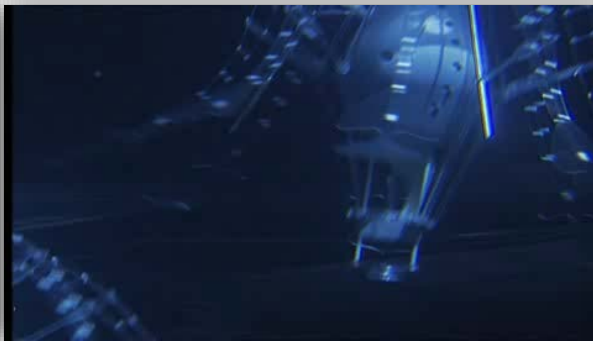

FESTO

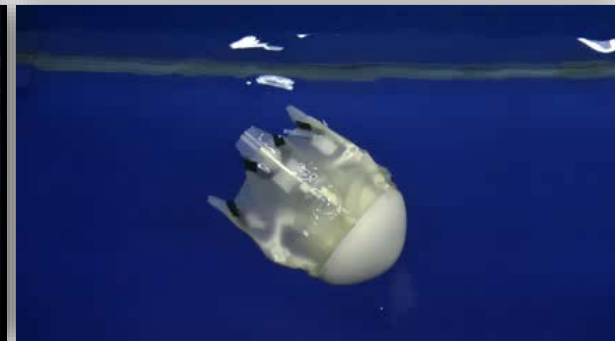

CASIA

# 02 PART TWO

## • Development of the Robotic Prototype •

# 2. Development of the Robotic Prototype

## A. Robotic System Description

- ▣ The designed robotic jellyfish models after *Aurelia aurita* (moon jellyfish), which has relatively large displacement and is especially suited for use with large load capacity.

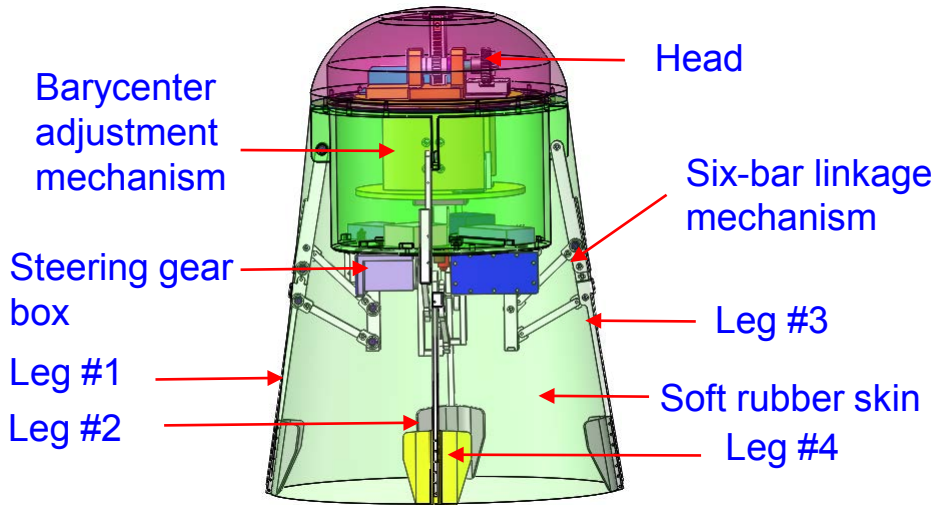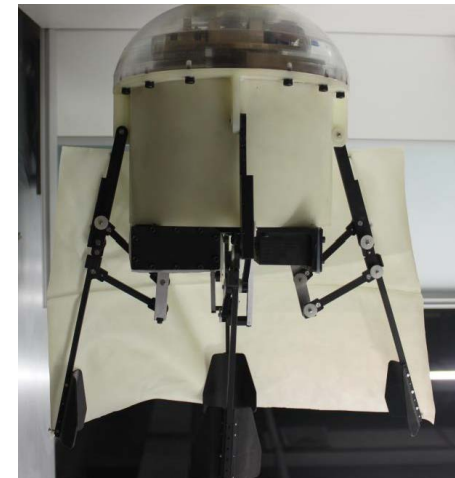

- Hemispherical in shape
- A bell-shaped rigid head
- A cylindroid main cavity
- Four separate six-bar linkage mechanisms
- A soft rubber skin

| Items      | Characteristics                             |
|------------|---------------------------------------------|
| Head       | $\phi = 242 \text{ mm}, h = 89 \text{ mm}$  |
| Cavity     | $\phi = 242 \text{ mm}, h = 138 \text{ mm}$ |
| Leg        | 331 mm (Length)                             |
| Mass       | 8.2 kg                                      |
| Actuator   | Four servos (HS-7980TH)                     |
| Sensors    | IMU, Pressure                               |
| Controller | STM32F407                                   |

# 2. Development of the Robotic Prototype

## B. Six-bar linkage mechanism

- ▣ The six-bar linkage structure is employed as main drive unit to convert the rotational motion of the servomotors to swing of the legs and generate propulsive thrust in water.

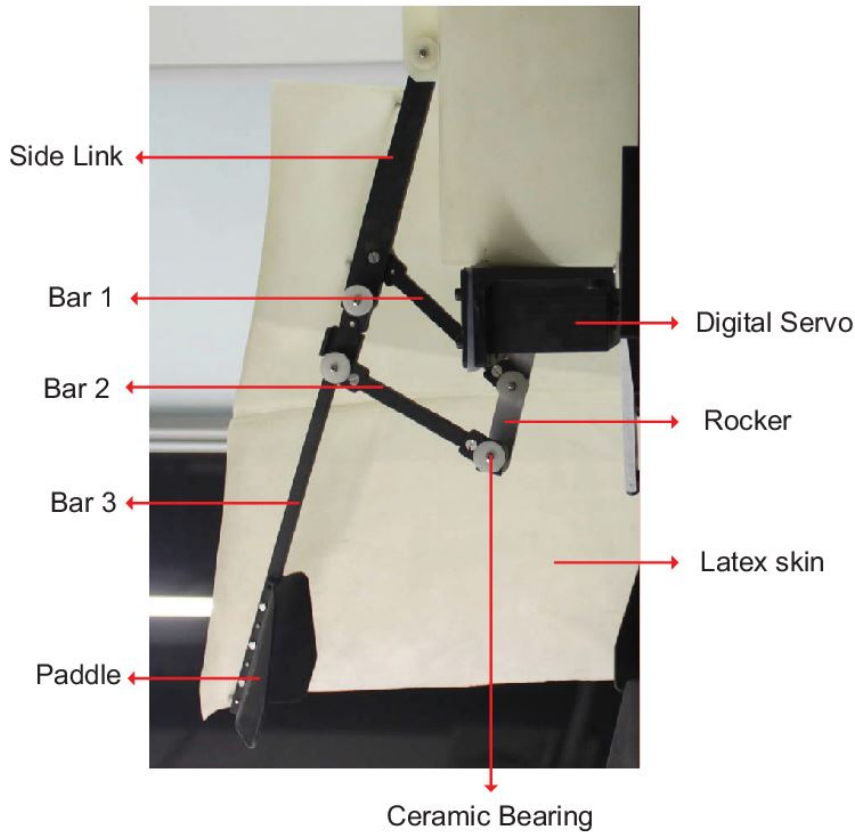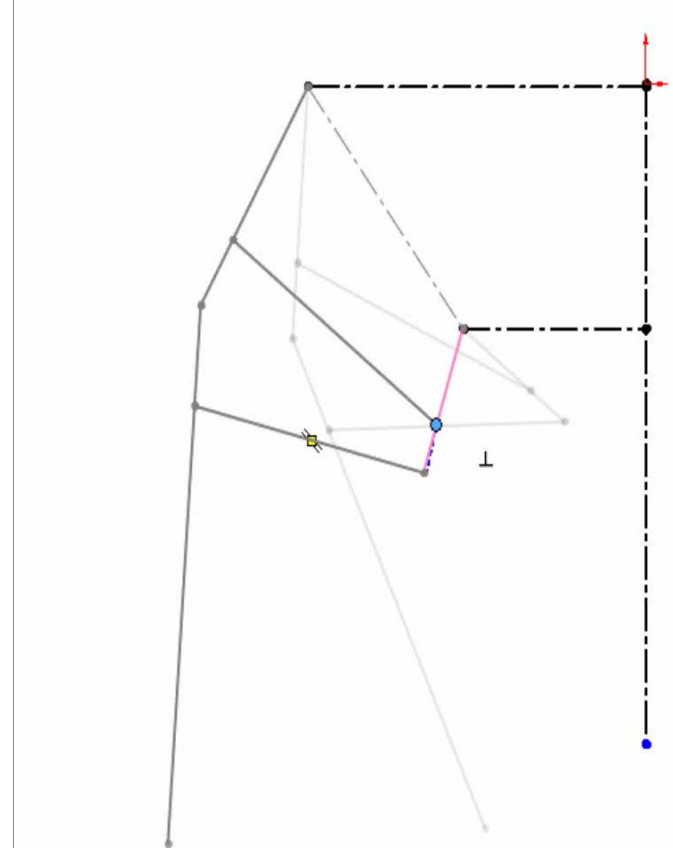

The six-bar linkage structure

# 2. Development of the Robotic Prototype

## C. Barycenter adjustment mechanism

- A barycenter adjustment mechanism is particular introduced for flexible attitude control, which regulates the center of the gravity through both horizontally and vertically altering the relative position of two clump weights.

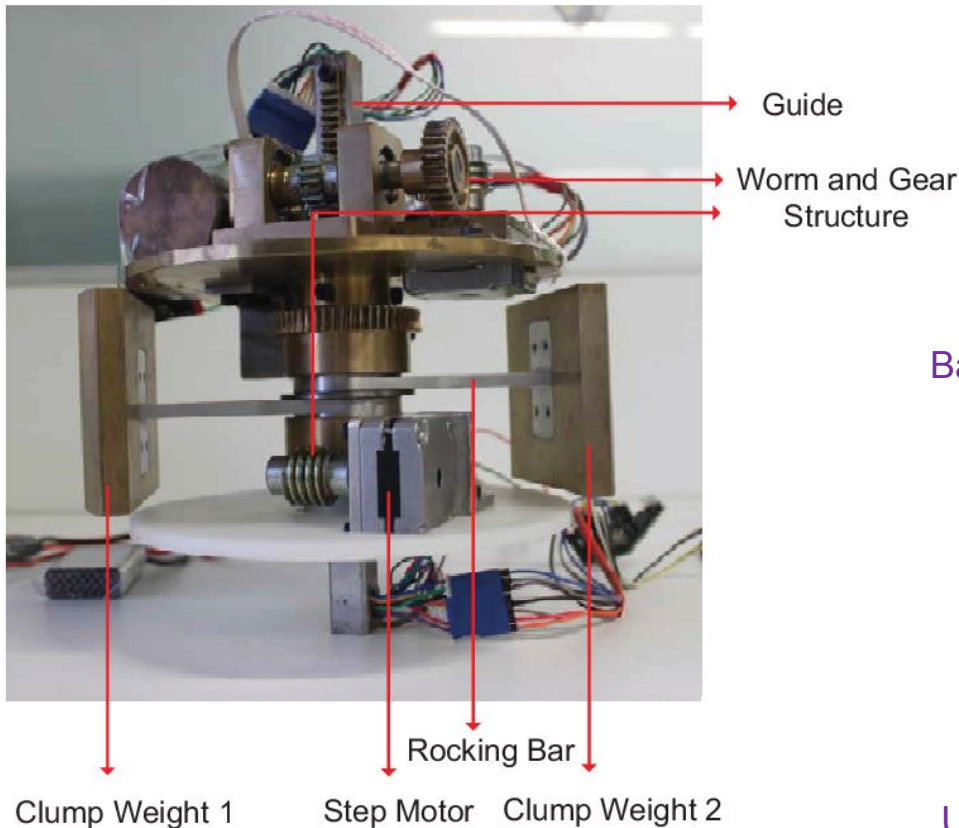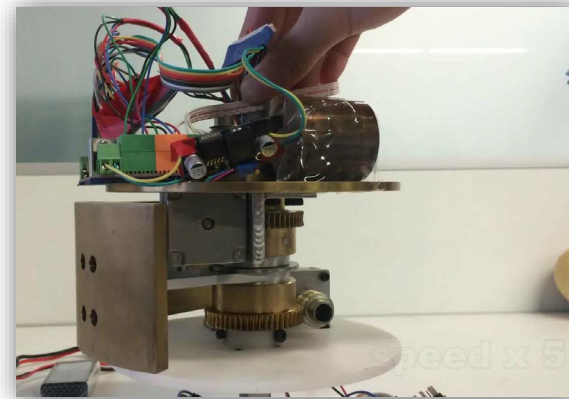

Balance movement in the horizontal direction

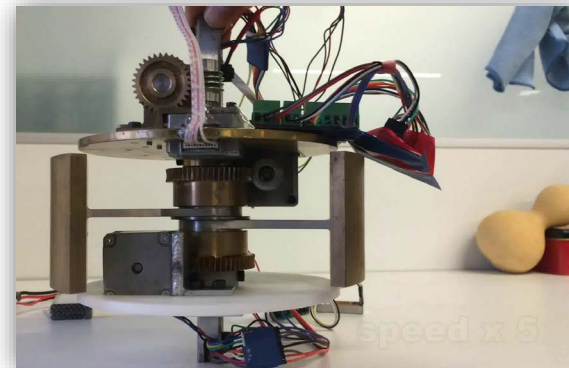

Up-down movement in the vertical direction



# 2. Development of the Robotic Prototype

## C. Barycenter adjustment mechanism

- The locus of barycenter is able to enwrap the center of buoyancy.
  - 16 mm in the vertical plane (y-z plane)
  - 64 mm in the horizontal plane (x-z plane)

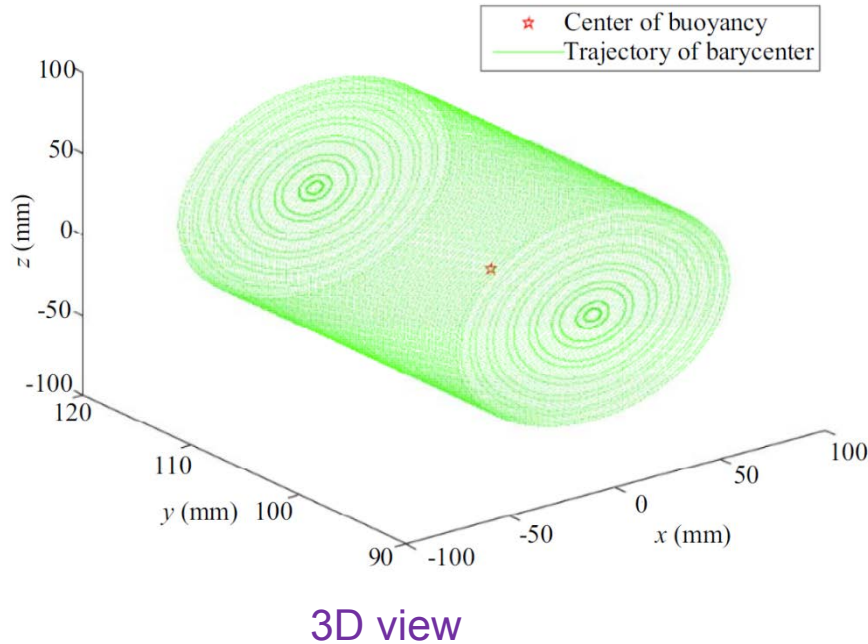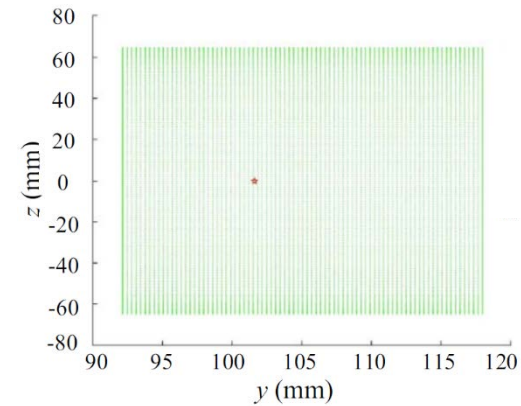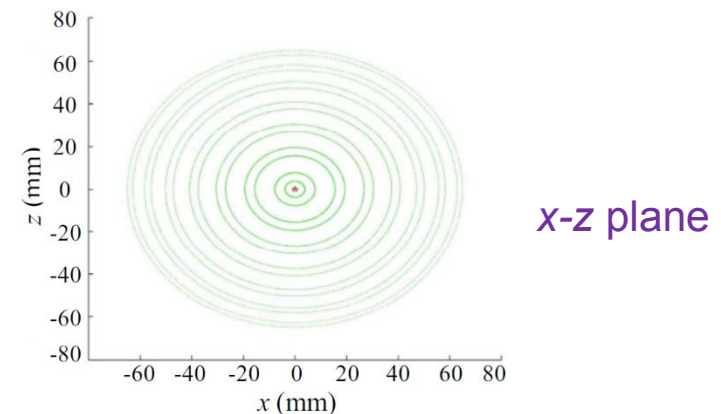

Relationship between the change of barycenter and the position of the buoyancy center from 3D view

# 03

**PART THREE**

## **Reinforcement Learning Based Attitude Control**

### 3. Reinforcement Learning Based Attitude Control

#### A. Q-learning

- ❑ A type of model-free reinforcement learning
- ❑ One of the most popular and powerful algorithms in real-world applications

The goal of Q-learning is to find a policy  $\pi^*$  that maximizes the reward received by the agent over time.

Q value  
(action-value)

$$Q^\pi(s_t, a_t) = \underbrace{r(s_t, a_t)}_{\text{Reward}} + \underbrace{\gamma \sum_{s_{t+1}} p_{s_t s_{t+1}}(\pi(s_t)) V^\pi(s_{t+1})}_{\text{Future discounted reward}}$$

Optimal policy

$$\pi^* = \arg \max_{a_t} Q(s_t, a_t)$$

Updated value

$$Q(s_t, a_t) \leftarrow Q(s_t, a_t) + \underbrace{\alpha}_{\text{Learning rate}} \left[ r(s_t, a_t) + \gamma \max_{a_{t+1}} Q(s_{t+1}, a_{t+1}) - Q(s_t, a_t) \right]$$

### 3. Reinforcement Learning Based Attitude Control

#### B. Attitude control

- ❑ Reinforcement learning has the ability to achieve adaptive controllers without access to accurate dynamical model, making it ideally suited for the flexible attitude control of the robotic jellyfish.
- ❑ Eliminate the burdensome process of tuning parameters and free the human resources and testing time to some extent.

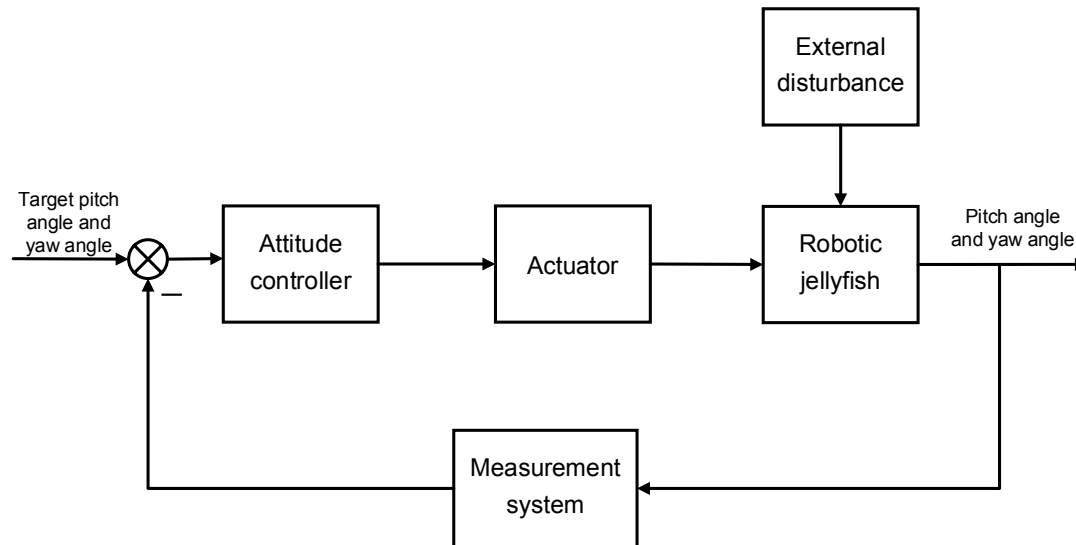

Block diagram of the proposed attitude control system of the robotic jellyfish

# 3. Reinforcement Learning Based Attitude Control

## B. Attitude control

The state and corresponding policies taken by the robotic jellyfish

- Three propulsive behaviors, i.e., backward swimming, straight swimming, and turn

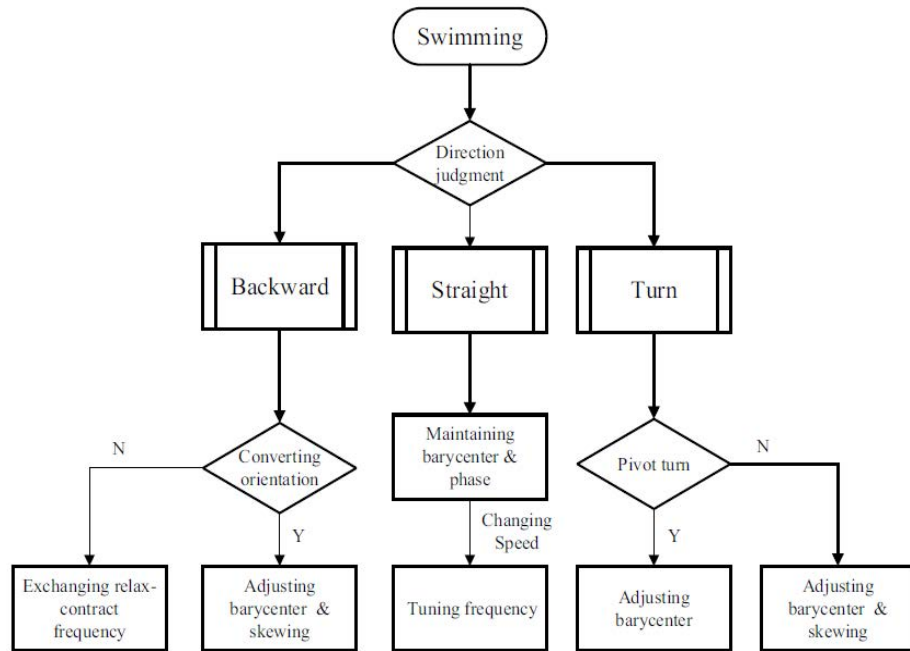

The corresponding elements of the RL based attitude control algorithm

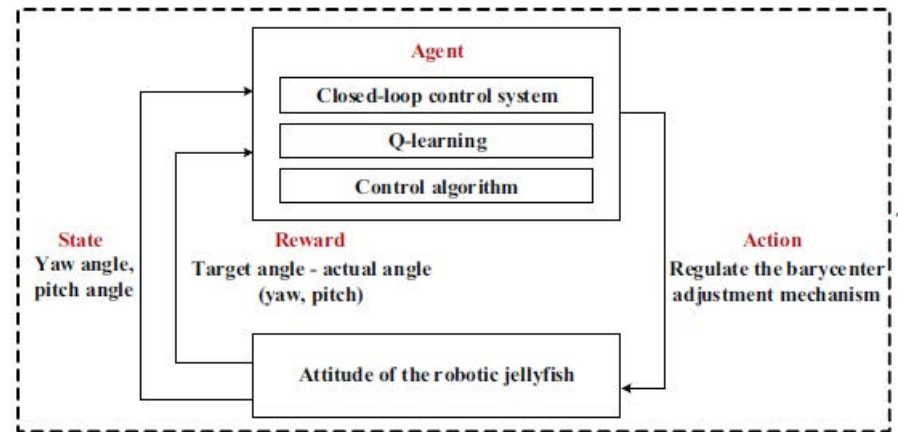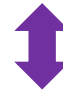

| Reinforcement learning | Attitude control of robotic jellyfish     |
|------------------------|-------------------------------------------|
| Agent                  | Attitude controller                       |
| Environment            | Attitude of the robotic jellyfish         |
| Environmental model    | Barycenter adjustment based control model |
| Reward                 | Difference between the actual and target  |
| Policy                 | Control algorithm                         |

# 3. Reinforcement Learning Based Attitude Control

## B. Attitude control

---

**Algorithm 1** Vertical balance control of the robotic jellyfish

---

```
1: for each  $i \in [1, N\_BOX]$  do
2:   Initialize the weights (action weights  $w$ , critic weights  $v$ , action weight eligibilities  $e$ , critic weight eligibilities  $xbar$ );
3: end for
4: while  $|box - TARGET| > 1$  do
5:   steps++;
6:   get box;
7:   get action;
8:   Update  $e[box]$ ,  $xbar[box]$ ;
9:   Remember prediction of failure for current state;
10:  Apply action to the robotic jellyfish;
11:  Get box of state space containing the resulting state;
12:  for  $i = 0; i < N\_BOX; i++$  do
13:    Update all weights;
14:    if failed then
15:      Set all traces to zero;
16:    else
17:      Update or decay the traces;
18:    end if
19:  end for
20:  if  $box < 0$  then
21:    Failure occurred and reset all parameter;
22:  else
23:    Reinforcement is  $(old\_box - new\_box)$ . Prediction of failure given by  $v$  weight;
24:    Reinforcement = current reinforcement +  $\gamma$  * new failure prediction - previous failure prediction;
25:  end if
26:  if  $steps > MAX\_STEPS$  then
27:    Failure occurred;
28:  end if
29: end while
```

---

# 04 PART FOUR

## Experiments and Results

---



## 4. Experiments and Results

### A. Vertical balance attitude learning experiment

- ❑ The roll angle of the robot is invalid because of the symmetric structure.
- ❑ Yaw and pitch actions are employed to regulate spatial heading of the robot.

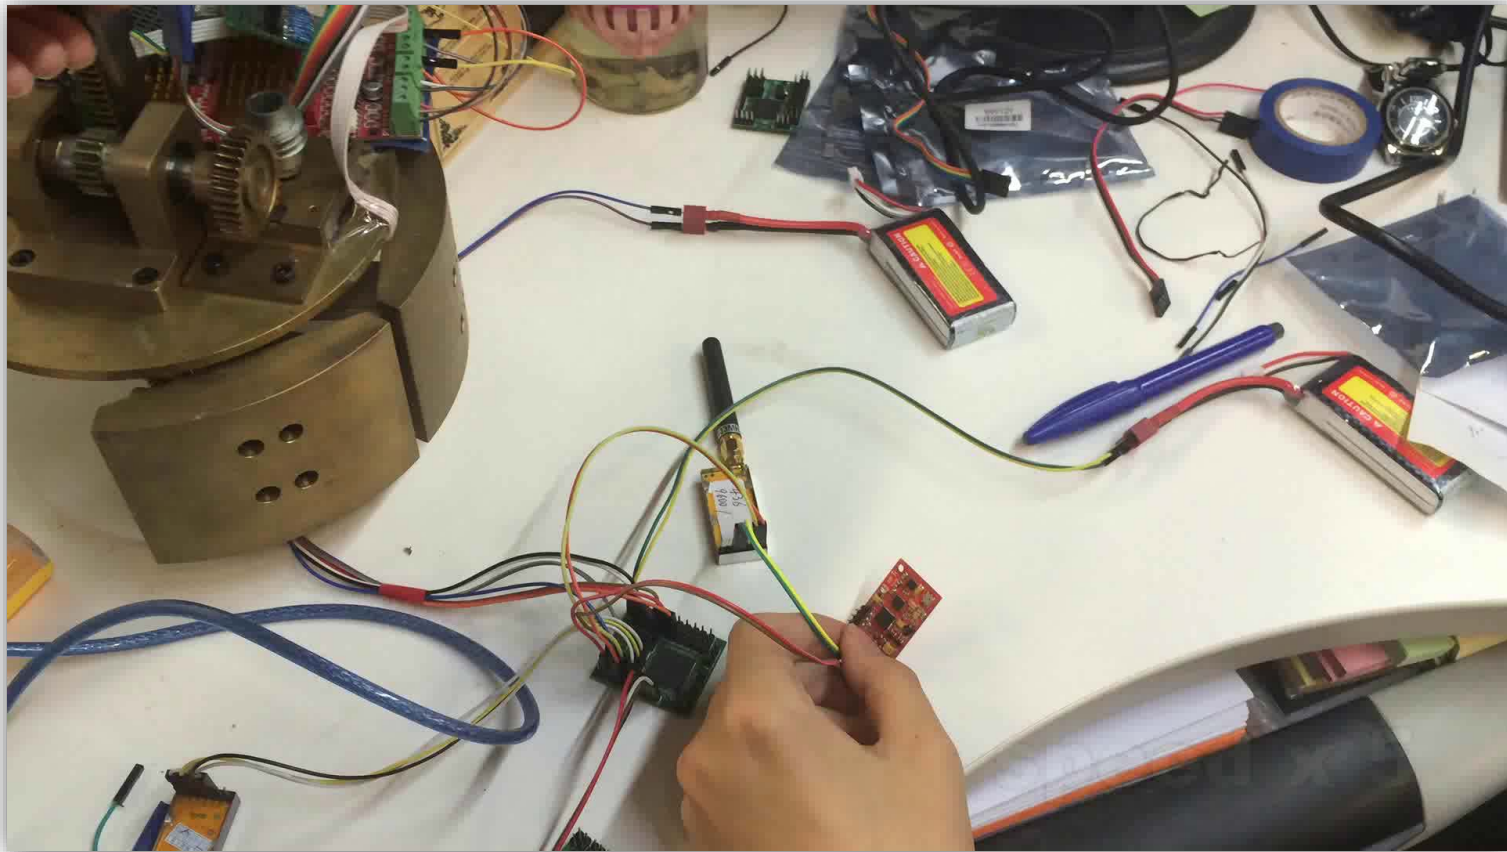

The vertical balance attitude learning process based on the Q-learning method



# 4. Experiments and Results

## A. Vertical balance attitude learning experiment

- Given swimming attitude
  - Yaw angle:  $280^\circ$
  - Pitch angle:  $50^\circ$

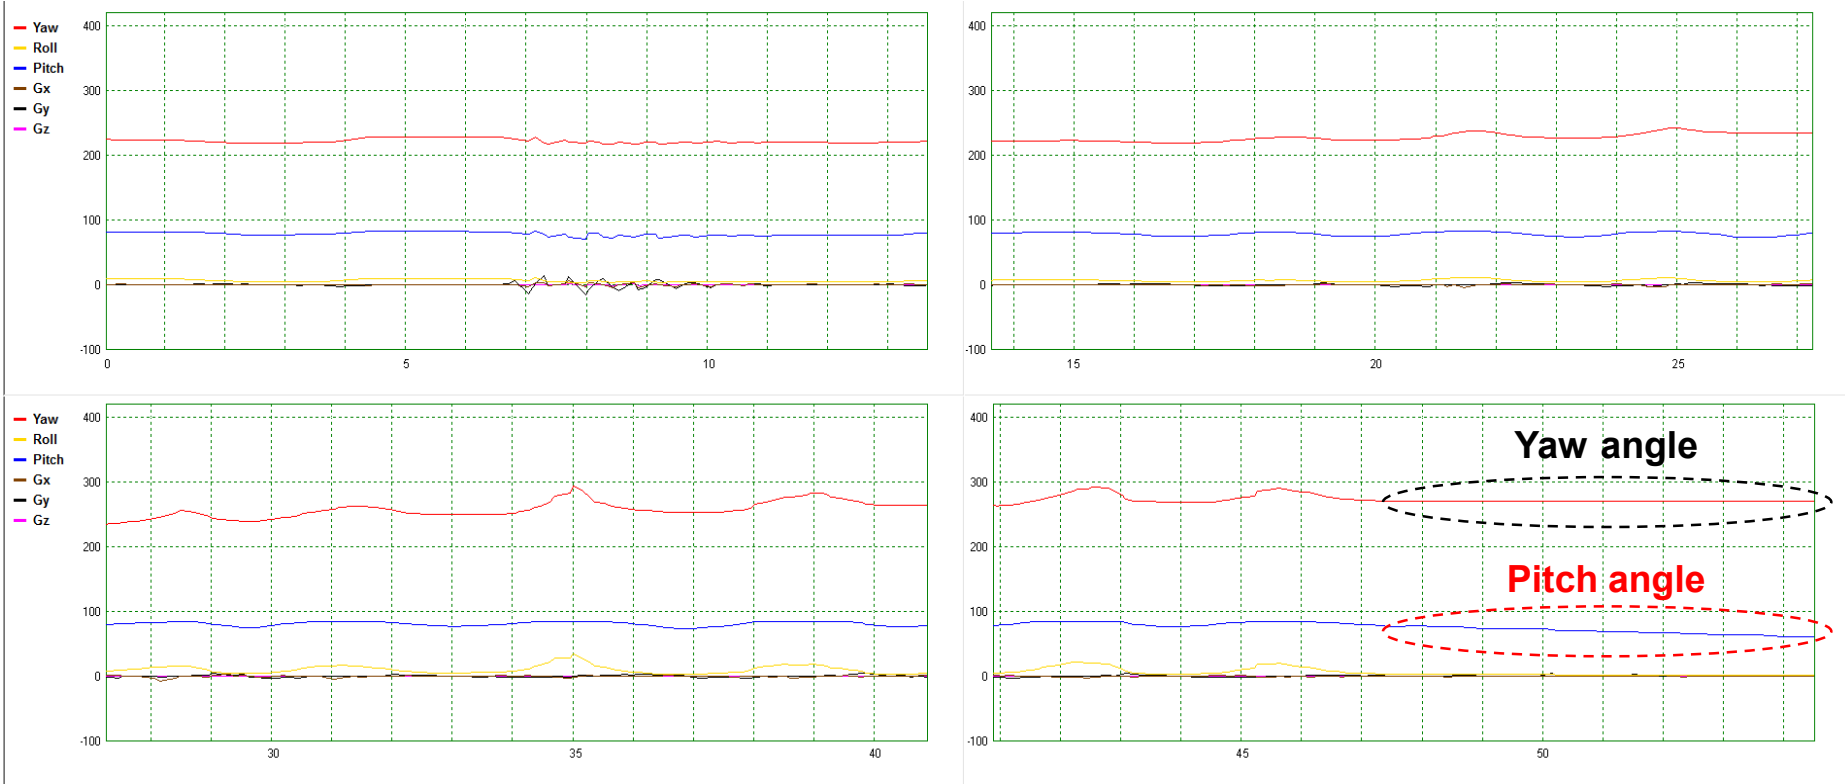

The attitude state of the robotic jellyfish during learning process

## 4. Experiments and Results

### B. Hybrid motion experiment

- A series of dynamic angles including compound changes of the target yaw and pitch were set.

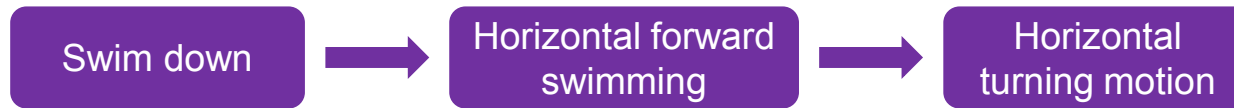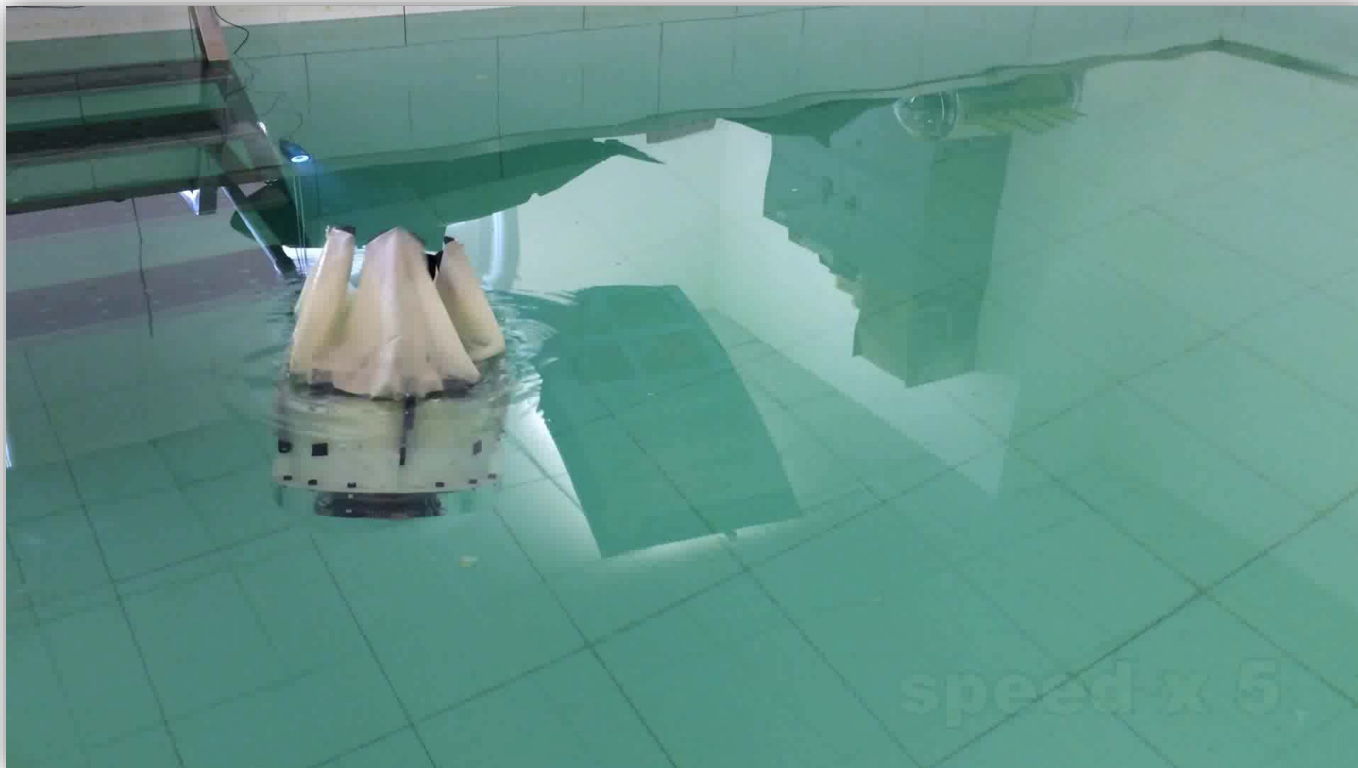

A hybrid motion interweaving vertical and horizontal swimming

# 4. Experiments and Results

## B. Hybrid motion experiment

- Horizontal swimming speed: 100 mm/s
- Yaw turning speed: 5.6°/s
- Pitch turning speed: 3.6°/s

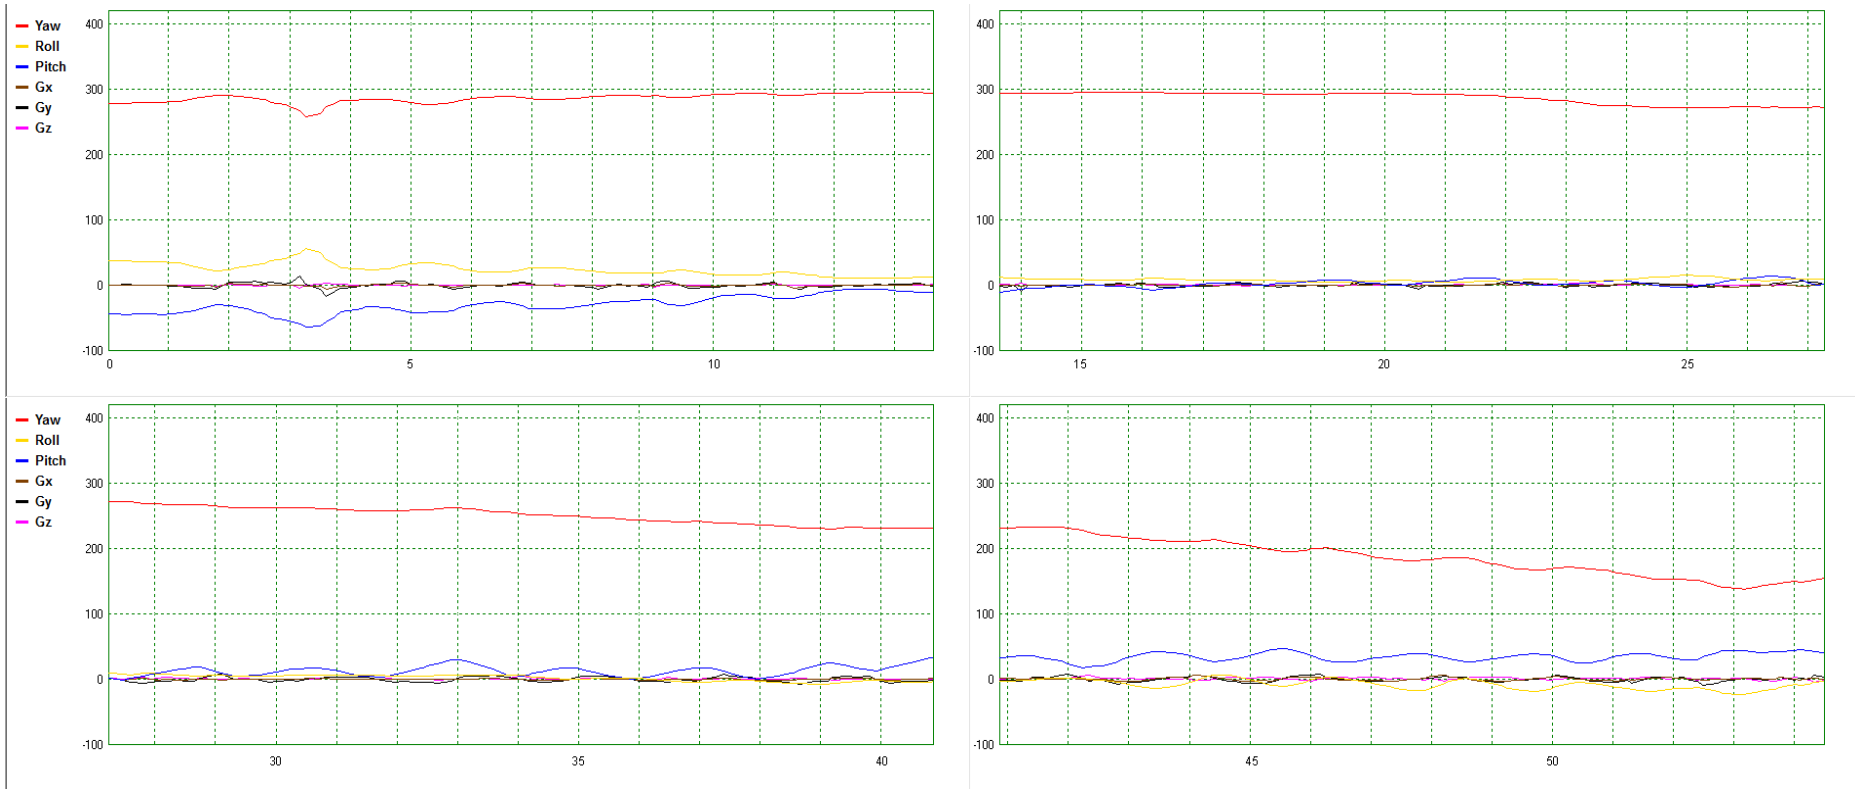

The attitude state in the hybrid motion experiment

# 05

PART FIVE

## Conclusion and Future Work

## 5. Conclusion and Future Work

### A. Conclusion

- 1) A novel self-propelled **robotic jellyfish** based on the multi-linkage propulsive mechanism and **barycenter adjustment mechanism** is developed.
- 2) The proposal of **a reinforcement learning based attitude control method** makes the robotic jellyfish learn a desired attitude in 3D space.
- 3) Aquatic experiments verify **the effectiveness of the presented mechanical design and attitude control method**.

### B. Future work

- More effort will focus on improving the attitude control method and the propulsive efficiency of the robotic jellyfish.

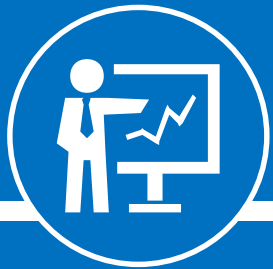

**Thank you for your attention!**
